1 **LEGAL AGE OF CONSENT FOR HIV TESTING AMONG ADOLESCENTS IN SUB SAHARAN AFRICA, A**  
2 **SYSTEMATIC REVIEW**

3 Getrud Joseph Mollel<sup>1,2</sup>, Andrew Katende <sup>1,2</sup>, Maryam Shahmanesh<sup>3,4</sup>

4 Affiliations

- 5 1. Ifakara Health Institute, Morogoro, Tanzania
- 6 2. St. Francis Referral Hospital, Morogoro, Tanzania
- 7 3. Africa Health Research Institute, South Africa
- 8 4. Institute for Global Health, University College London, UK

9

10 **Corresponding author:** *email:* [gjoseph@ihi.or.tz](mailto:gjoseph@ihi.or.tz)

11

12

13

14

15

16

17

18

19

20

21

22

23

24

**NOTE: This preprint reports new research that has not been certified by peer review and should not be used to guide clinical practice.**

## 25 **Abstract**

26 Sub Saharan Africa (SSA) harbours more than 80% of adolescents living with HIV. High age of consent for  
27 HIV testing has been identified as one of the key barriers to adolescents' access to HIV testing. We conducted  
28 a systematic literature review to demonstrate the status of age of consent policies in SSA and evidence of  
29 relationship between age of consent policies and adolescent's uptake of HIV testing. We obtained peer  
30 reviewed literature from Medline, Embase, Scopus and Web of Science databases and policy review from  
31 national HIV testing guidelines and UNAIDS data reports. Age of consent for HIV testing in the region ranged  
32 between 12 and 18 years. Among 33 included countries, 14 (42.4%) had age of consent between 12 – 14  
33 years, 9 (27.3%) had age of consent between 15 – 17 years and 10 countries (30.3%) still have the highest  
34 age of consent at 18 years as of 2019. Lowering age of consent has been associated with increased access to  
35 HIV testing among adolescents.

36

37

## 38 **INTRODUCTION**

39 Sub Saharan Africa (SSA) harbours almost half of all HIV infected individuals and more than 80% of  
40 adolescents living with HIV.(1–3) AIDS related deaths have declined by more than a third globally, Eastern  
41 and Southern Africa showing the steepest reduction largely due to the scale up of HIV testing and coverage of  
42 antiretroviral therapy.(4) However, this improvement has not been uniform across all age groups. AIDS  
43 persisted as one of the leading causes of death for adolescents in Africa (5), with significantly higher rates of  
44 new infections in young girls than boys.(3) Reported reduction in AIDS related mortality among adolescents in  
45 2018 was less than half the decline observed among adults aged above 20 years (16% versus 35%).(6)

46 Adolescence, defined as the age span from 10-19 years inclusively, is a complex developmental stage  
47 comprised of cognitive, physical, biological and psychological growth and characterised by social, personality  
48 and sexual exploration and maturation.(7,8) Adolescents have a higher likelihood of engaging in risky  
49 behaviours such as unsafe sexual practises which puts them at a higher risk of contracting HIV. Those who  
50 are part of HIV key populations including men who have sex with men, transgender people, intravenous drug  
51 users and commercial sex workers are even at a higher risk of contracting HIV and lower access to HIV

52 testing especially in countries where they are criminalised.(5,9,10) Policies in many countries still restrict  
53 adolescents' independent access to HIV testing without parental consent.(4) The proportion of adolescents  
54 who are aware of their HIV status is lower than that of adults.(11) Adolescent girls and young women  
55 contribute 26% of new HIV infections in Eastern and Southern Africa region, yet age of consent policies  
56 continue to be a barrier to HIV testing.(3,4) Furthermore, adolescents and youths represent the fastest  
57 growing population group in SSA which might precipitate the observed trend of new HIV infection among  
58 them, necessitating wider access to HIV testing and treatment services.(12)

59 Access to HIV testing is the gateway into HIV care and prevention. Therefore, as part of their commitment  
60 to scaling up of access to HIV services to all people including adolescents, WHO called upon heads of state to  
61 lower the age of consent for HIV testing.(13–15) Wider access to HIV testing among adolescents will  
62 complement several other interventions which are implemented in SSA with the aim of improving HIV  
63 outcomes among this age group. Such interventions include the adolescents' friendly clinics, addressing HIV  
64 related stigma, promotion of abstinence and use of condoms, school based sex education, active case finding,  
65 use of incentives, provider initiated testing and counselling, voluntary male medical circumcision and other  
66 behavioural change interventions.(16–20) Adolescents require wider access to HIV testing especially for the  
67 realisation of public health benefits of starting antiretroviral treatment immediately after HIV diagnosis,(21)  
68 and other recent interventions such as Pre-exposure prophylaxis and HIV self-testing.(22,23) Removal of legal  
69 barriers to HIV testing could improve the extent to which adolescents benefit from these interventions.(24,25)  
70 We conducted a systematic literature review on age of consent policies with an objective of demonstrating the  
71 status of age of consent policies in SSA and evidence of the relationship between age of consent and  
72 coverage of HIV testing among adolescents in the region.

73

## 74 **METHODS**

75 We did a guideline review to summarise the age of consent for HIV testing in SSA followed by a systematic  
76 review of literature to assess the relationship between age of consent and access to HIV testing amongst  
77 adolescents in SSA. The PICO aspects of the review were as follows; population of interest was adolescents

78 aged between 10-19 years, the intervention assessed was low age of consent, and the outcome was access  
79 to HIV testing among adolescents which was compared between countries with lower age of consent versus  
80 those with higher age of consent.

### 81 **Inclusion and exclusion criteria**

82 We included the latest HIV testing guidelines supplemented with the UNAIDS global HIV reports and studies  
83 that were in the English language and from SSA countries. We defined SSA as countries geographically  
84 located South of the Sahara, as per the United Nations' definition. We included studies that discussed the age  
85 of consent for HIV testing in adolescents in SSA region. Studies that included children, youths and young  
86 people were included in the initial search criteria due to the age overlap in definition of these age groups.  
87 Adolescence is defined as the age between of 10 to 19 years inclusively, while a child is defined as any person  
88 from birth up to the age of 18 years, a young person is defined as the age of 10 up to 24 years, and a youth  
89 is any person between the ages of 15 to 24.(8,26). Studies that did not include adolescents were then  
90 excluded at later literature screening stages.

91 For the outcome of access to HIV testing we included studies that explored how age of consent influences  
92 HIV testing among adolescents aged between 10 to 19 years in SSA countries. We included studies which  
93 were conducted after 2013 as this was the year that WHO issued a review of consent age policies in SSA and  
94 called for governments consider lowering the age at which adolescents can independently access to HIV  
95 testing. (15,27) We did not limit studies based on their methodology. We included both quantitative and  
96 qualitative studies together with reviews of laws and policies related to age of consent for HIV testing. To  
97 assess changes in age of consent policies, we compared the age of consent reported in the 2013-WHO review  
98 to that stated in countries' latest HIV testing guidelines and UNAIDS country data reports by 2019.  
99 We excluded studies if the focus was on age of consent for inclusion in HIV research.

### 100 **Search strategy**

101 We searched for peer reviewed articles from Medline, Embase, Scopus and Web of science, and grey  
102 literature and policies from HIV testing guidelines, WHO guidelines and UNAIDS reports. *Table 1* summarises  
103 the key words, medical subject headings (Mesh) terms and proximity operators we used to search for the  
104 relevant literature.

## 105 **Literature screening**

106 GJM conducted the literature search and screened all material according to the inclusion criteria. KA reviewed  
107 the materials against the inclusion and exclusion criteria. MS supervised literature search, screening and  
108 synthesis of results. Mendeley referencing software v.1.19.5 was used for literature management.

## 109 **Ethical considerations**

110 We only included published materials without any inclusion of individual participants' data. We therefore did  
111 not seek for further ethical approval

112

## 113 **RESULTS**

114 We found 376, 446, 452 and 298 articles from Medline, Embase, Scopus and Web of science respectively. We  
115 obtained a total of 360 publications after removal of duplicates. We further excluded 261 and 76 articles at  
116 title screening and abstract screening stages respectively. 23 articles were eligible for full text screening  
117 where we further excluded 15 due to the following reasons; 2 articles discussed about consent for inclusion to  
118 HIV research and trials, full text literature for 1 article could not be found, 2 articles discussed HIV testing for  
119 children younger than 10 years old and 10 articles did not include discussion about age of consent among  
120 factors affecting HIV testing for adolescents. *Figure 1* shows the PRISMA flow diagram for literature  
121 screening. We finally included 8 articles from SSA. These included four quantitative studies,(28–31) one  
122 qualitative study,(32) and three reviews of HIV-specific policies, laws and legislative frameworks that affect  
123 adolescents' access to HIV testing in SSA (33–35).

124 We extracted age of consent from national HIV testing guidelines of Kenya, (36) Uganda,(37) Rwanda,(38)  
125 Ethiopia,(39) Malawi,(40) Zimbabwe,(41) Cameroon,(42) Ghana,(43) Swaziland,(44) Lesotho (45) and South  
126 Africa(46). We supplemented with a legal framework review from Tanzania (47) and UNAIDS country data  
127 reports of 2018 and 2019 (4,48). We included 33 SSA countries in total.

## 128 **Age of consent for HIV testing**

129 The lowest age of consent for HIV testing among the countries included in this review was 12 years, while the  
130 highest was 18 years. *Table 2* shows the age of consent as reported in the WHO's review of 2013 as  
131 compared to the country's age of consent as indicated in the latest HIV testing guidelines or UNAIDS reports.  
132 In 2013, 5 (12.4%) countries had age of consent between 12 to 14 years, 15 to 17 years in 8 (24.2%) and 18

133 years in 12 (36.4%) countries. 6 (18.2%) countries had not defined age of consent for HIV testing for  
134 adolescents while 2 countries (Kenya and Botswana ) were reported in 2013 as countries that apply maturity  
135 assessment by the healthcare provider rather than chronological age to determine adolescent's ability to  
136 consent for HIV testing.(15). By 2019, the age of consent for HIV testing was 12 to 14 years in 14 (42.4%)  
137 countries, 15 to 17 years in 9 (27.3%) countries and 18 years in 10 (30.3%) countries. Between 2013 and  
138 2019, Cameroon and Central African Republic lowered the age of consent from 18 years to 14 years, whereas  
139 Cote d'ivoire, Niger and Tanzania lowered it from 18 years to 16 years. This left Angola, Bukina Fasso, DRC,  
140 Djibouti, Ghana, Madagascar, Mali, Nigeria, Sierra Leone and Sudan with the highest age of consent for HIV  
141 testing in the region. The lowest age of consent in the region was 12 years in Uganda, South Africa, Rwanda,  
142 Lesotho and Swaziland. *Figure 2* shows a diagrammatic presentation of changes in number of countries with  
143 respect to age of consent in 2013 as compared to 2019.

#### 144 **Association between age of consent and HIV testing**

145 McKinnon and colleagues quantitatively explored the association between age of consent and uptake of HIV  
146 testing among adolescents by using demographic and health survey data from 15 SSA countries. They found  
147 that age of consent below 16 years was associated with 11% (95%CI: 7.2-14.8) increase in uptake of HIV  
148 testing among adolescents.(28) Another study which used demographic and health survey data assessed  
149 predictors of HIV testing among adolescents and youths in Uganda, Congo, Mozambique and Nigeria also  
150 concluded that participants aged 20-24 years had higher odds of HIV testing than adolescents aged 15-19  
151 years (aOR– 2.19; 99%CI 1.99-2.40). This finding was attributed to the fact that older participants could  
152 independently consent for HIV testing without requirement of parental consent. The overall uptake of HIV  
153 testing was low whereby only one third of the 23,367 included participants reported to have ever tested for  
154 HIV. They observed the highest coverage of HIV testing amongst adolescents in Uganda, where age of  
155 consent policies allow adolescents to access HIV testing from the age of 12 years.(29) These results are in  
156 congruence with adolescents' views expressed in a qualitative assessment of HIV testing experience among  
157 adolescents, health care workers and parents in Kenya.(32) In this study, adolescents preferred to have  
158 independent access to HIV testing without parental consent requirements. They reported that they would  
159 prefer post-test counselling support and a choice on how to handle disclosure of their HIV status. While  
160 adolescents' opinion should be taken into consideration when designing policies to improve their uptake of

161 HIV testing services, parents on the other hand preferred to be informed about HIV status of their children  
162 even when it's contrary to adolescents' preference.(32) Mixed findings were also reported from cross sectional  
163 studies aimed at assessing parents' attitudes towards implementation of HIV testing at schools in South Africa  
164 following findings of a high desire for a school-based HIV testing services among adolescents.(30,31) Among  
165 801 parents who participated in the survey, 46% reported that students can access HIV testing at school  
166 without requirements of parental consent, whereas 39% reported that HIV results should be communicated  
167 to the adolescents in the presence of their parents.(30) Healthcare workers in Kenya also reported that they  
168 sometimes deny adolescents testing services unless they are pregnant, married or parents, (32) despite the  
169 fact that the HIV testing guideline in Kenya allow adolescents aged above 15 years to access HIV testing  
170 without parental consent.(36)

### 171 **Policies and legal frameworks in relation to HIV testing**

172 We included three articles that discussed policies, laws and legal frameworks affecting adolescents' access to  
173 HIV testing in SSA. These included one desk review of HIV related laws of Angola, Benin, Burkina Fasso,  
174 Burundi, Cape Verde, Central African Republic, Chad, Comoros, Congo, Cote d'Ivoire, Democratic Republic of  
175 Congo, Equatorial Guinea, Gambia, Guinea, Guinea Bissau, Kenya, Liberia, Madagascar, Mali, Mauritania,  
176 Mauritius, Mozambique, Niger, Senegal, Sierra Leone, Tanzania, Togo and Uganda,(33) a review of health  
177 policy gaps that affect adolescents access to HIV services in Rwanda,(34) and a review of South African  
178 legislative reform for improvement of adolescents' access to sexual and reproductive health services including  
179 HIV testing.(35) The review from 28 SSA countries examined HIV related laws against WHO's  
180 recommendations to lower the age of consent for HIV testing and ensure access to HIV testing, counselling  
181 and treatment among adolescents. Of the reviewed laws, 11 countries had explicitly stated the age at which  
182 adolescents can independently access HIV testing whereby only 7 of them had the age of consent set below  
183 18 years. Criteria for independent access to HIV testing for HIV testing other than chronological age included  
184 sufficient maturity, emancipated minor, pregnant or married adolescents, adolescents who are married or  
185 those at higher risk of acquiring HIV infection for Kenya, Comoros, Mauritius, Madagascar, Togo, Sierra Leone  
186 and Niger. None of the laws had an explicit definition of maturity with respect to HIV testing. Age of consent  
187 for HIV testing in Kenya HIV testing policies was found to be different from the age stated in the law. This  
188 review highlighted the need of reforms to address inadequacy of HIV specific laws in SSA in enhancing

189 adolescents' independent access to HIV testing.(33) Additionally, Binagwaho and his colleagues used a human  
190 right approach to argue that adolescents have a right to access confidential HIV testing services and their  
191 results to only be disclosed if they agree to it. They called for a reduction of age of consent for HIV testing  
192 from 21 years which was a default age at which an adolescent acquired majority and ability to consent for  
193 HIV testing in Rwanda to coincide with adolescents sexual behaviours.(34) Current HIV testing guidelines in  
194 Rwanda allows for independent consent for HIV testing for adolescents from the age of 12 years and mature  
195 enough to understand implications of HIV testing and to be able to cope in case of positive results.(38)  
196 Through its legislative reforms, South Africa also allowed independent consent for HIV testing from mature  
197 adolescents aged 12 years and above.(35) However, adolescents who are above 12 years and rendered by  
198 healthcare provider to be not mature enough to understand the benefits of HIV testing are still required by  
199 the South African HIV testing guideline to provide parental consent.(46)

200

## 201 **DISCUSSION**

202 We found that the majority of the countries have the age of consent for HIV testing between 12 and 14 years  
203 and all countries have explicitly mentioned the age at which adolescents can independently access HIV test.  
204 This is substantial progress compared to 2013 where 6 countries had not defined the age of consent for HIV  
205 testing. Access to HIV testing is an entry point to HIV treatment services and prevention of further new  
206 infection and the limited data in this review suggests that age of consent is associated with uptake of HIV  
207 testing amongst adolescents. However, despite progress in removing age of consent as a barrier towards HIV  
208 testing, adolescents in the region still contribute more than one third of new HIV infections.(3)

209 There were only two studies that quantitatively assessed the association of HIV testing and legal age of  
210 consent where a higher uptake was reported among countries with low age of consent (28,29). Suboptimal  
211 response of countries may be attributed to paucity of evidence showing the extent to which adolescents' HIV  
212 testing improves after lowering age of consent. A study among adolescents from 32 states of the US where  
213 requirement of parental consent for adolescents to access HIV testing was waived reported that there was no  
214 significant statistical association between legal ability to consent and uptake of HIV testing (aOR-0.3%  
215 (95%CI 0.1,1.1)).(49) However the results could have been swayed by several limitations of the study



216 including recall and social desirability bias and default exclusion of non-internet users who could have been  
217 systematically different from internet using adolescent who participated in the study. Arguably, everyone  
218 including adolescents have rights to access HIV testing services especially now when universal access to  
219 health care is among the priority global health agendas in developing countries and globally. However, it is  
220 necessary to understand the added advantage of lowering the age of consent together with establishing the  
221 role of contextual factors that might limit adolescents' access to HIV testing even in the settings of low age of  
222 consent.

223 Secondly, there are no evidence based maturity assessment methods to determine adolescents who should be  
224 allowed to access HIV testing without parental consent. Most national guidelines point towards the use of  
225 sexual maturity such as being pregnant, being a parent or in a higher risk of contracting HIV as a gateway for  
226 independent access to HIV testing among adolescents. The use of sexual related indicators of maturity  
227 systematically excludes adolescents who are not sexually active but could have been perinatally infected-long  
228 term slow progressors.(50,51) It also segregates against adolescents who are not yet sexually active but may  
229 benefit from HIV testing as a gateway into HIV prevention counseling. Furthermore, such criteria provide  
230 independent access to HIV testing after exposure to the risk of infection.

231 Additionally, we found that it is largely left at health workers' individual discretion to decide whether  
232 adolescents are mature enough to access HIV testing. Definition of maturity is bound to differ between  
233 individuals, and across cadres i.e., nurses, medical doctors, social scientists, psychologists, lawyers and  
234 counsellors. It may also differ depending on social construct, culture and development of both the provider  
235 and the client.(52) Adolescent health experts from various fields including ethics, sociology, law and medicine  
236 who convened in 2015 recommended assessment of adolescent's capability for decision making in clinical care  
237 should include understanding of the legal requirements, conducive and non-judgemental environment and  
238 objective assessment of social, emotional and cognitive development.(53) Guidelines for evaluation of  
239 adolescents capacity to consent for HIV testing could also be adopted from "Gillick competence" assessment  
240 criteria which originated from the United Kingdom, used mainly to assess adolescents cognitive ability to  
241 consent for a variety medical services such as sexual health service and immunization.(54,55) Countries in  
242 SSA could adopt and validate such kind of assessments which would enable timely HIV diagnosis among

243 adolescents. It would also give access to adolescents who may not have been exposed already, and open the  
244 window for HIV prevention counselling to them and their peers.

245 Studies showed that parents required to be notified about adolescents' HIV status despite of their disclosure  
246 preferences which contributes to healthcare workers hesitancy in offering HIV test for adolescents even in  
247 settings of favourable consent policies.(30,32) Unwanted and uninformed disclosure to third parties including  
248 parents might discourage adolescents from accessing HIV testing service even after lowering the legal age of  
249 consent. Parents' and healthcare workers should therefore be sensitized on importance of lowering the age of  
250 consent to allow truly autonomous access of HIV testing among adolescents. Furthermore, social networks  
251 including families, peers and surrounding societies may play an important demand-side influence on  
252 adolescent's decision and ability to seek for HIV testing.(56) Their perceptions on adolescents' autonomous  
253 access to HIV testing should therefore be explored and addressed in order to maximise benefits of lower age  
254 of consent on adolescents' access to HIV testing.

255 This review adds to the existing literature that calls for lowering the age of consent for HIV testing in SSA  
256 region while assessing and addressing other factors that might impede benefits of lower age of consent. It  
257 has triangulated findings from legal reviews, HIV testing guidelines and qualitative and quantitative studies.  
258 This review was not without limitations. We did not include articles and national guidelines which were not  
259 published in English which may bias the results. We also included only 33 countries from the region. However,  
260 this was done based on the countries which were included in the WHO 2013 report to allow comparison, and  
261 availability of data on age of consent policies.

262

## 263 **CONCLUSION**

264 Age of consent for HIV in SSA region ranges from 12 to 18 years. Majority of countries in SSA countries  
265 currently allow adolescents aged between 12 to 14 years to independently consent for HIV testing. However,  
266 there were countries that continued to maintain the highest age of consent (18 years). There is a need for  
267 context specific evaluation of benefits of lower age of consent and other factors that impede adolescents'  
268 access to HIV testing even in settings of favourable consent policies.

269

270 **Conflicts of interest**

271 The authors declare no conflict of interest

272

273 **Contributions from authors**

274 GJM conceived the idea, formulated the research question, conducted literature search, screening of materials  
275 and drafted the manuscript

276 KA reviewed the literature search against eligibility criteria and reviewed the manuscript.

277 MS supervised the literature search and reviewed the manuscript

278

279 **Funding source**

280 There was not funding sought for completion of this review

281

282

283

284

285

286

287

288

289

290

291

292

293

294

295 **References;**

- 296 1. UNICEF. All IN #EndAdolescentAIDS. 2015.
- 297 2. Kharsany ABM, Karim QA. HIV Infection and AIDS in Sub-Saharan Africa : Current Status, Challenges  
298 and Opportunities. 2016;34–48.
- 299 3. UNAIDS. SEIZING THE MOMENT, GLOBAL AIDS UPDATE. 2020.
- 300 4. UNAIDS. UNAIDS DATA 2019. 2019.
- 301 5. Idele P, Gillespie A, Porth T, Suzuki C, Mahy M, Kasedde S, et al. Epidemiology of HIV and AIDS Among  
302 Adolescents: Current status, Inequities and Data gaps. JAIDS Journal of Acquired Immune Deficiency  
303 Syndromes. 2014;66:S144–53.
- 304 6. UNAIDS. Start Free Stay Free AIDS Free 2019 report. 2019.
- 305 7. WHO. Global Accelerated Action for the Health of Adolescents (AA-HA!) Implementation Guidance,  
306 2016-2030. 2016. 1–155.
- 307 8. UNCRC. CRC General Comment No. 4: Adolescent Health and Development in the Context of the  
308 Convention on the Rights of the Child. Vol. 4, Crc/Gc/2003/4. 2003.
- 309 9. WHO, UNAIDS. GLOBAL STANDARDS FOR QUALITY HEALTH-CARE SERVICES FOR ADOLESCENTS. Vol. 1.  
310 2015.
- 311 10. Bekker L-G, Johnson L, Wallace M, Hosek S. HIV and adolescents : focus on young key populations.  
312 JAIDS. 2015;18(Supplement 1).
- 313 11. Wong VJ, Murray KR, Phelps BR, Vermund SH, Mccarraher DR. Adolescents, young people, and the 90  
314 – 90 – 90 goals : a call to improve HIV testing and linkage to treatment. AIDS. 2017;(Supplement  
315 3):191–4.
- 316 12. UNAIDS. THE YOUTH BULGE AND HIV. 2018.
- 317 13. United Nations. Political Declaration on HIV and AIDS: On the Fast Track to Accelerating the Fight  
318 against HIV and to Ending the AIDS Epidemic by 2030. 2016.
- 319 14. Piot P, Abdool Karim SS, Hecht R, Legido-Quigley H, Buse K, Stover J, et al. Defeating AIDS - Advancing  
320 global health. The Lancet. 2015;386(9989):171–218.
- 321 15. Fox K, Ferguson J, Ajose W, Singh J, Marum E, Baggaley R. ADOLESCENT CONSENT TO HIV TESTING: A  
322 REVIEW OF CURRENT POLICIES AND ISSUES IN SUB- SAHARAN AFRICA. WHO publications. 2013;(2):1–  
323 26.
- 324 16. Kranzer K, Simms V, Bandason T, Dauya E, McHugh G, Munyati S, et al. Economic incentives for HIV  
325 testing by adolescents in Zimbabwe: a randomised controlled trial. The Lancet HIV. 2018;5(2):e79–86.
- 326 17. Penda CI, Moukoko CEE, Koum DK, Fokam J, Meyong CAZ, Talla S, et al. Feasibility and utility of active  
327 case finding of HIV-infected children and adolescents by provider-initiated testing and counselling:  
328 evidence from the Laquintinie hospital in Douala, Cameroon. BMC pediatrics. 2018;18(1):259.

- 329 18. Simms V, Dauya E, Dakshina S, Bandason T, McHugh G, Munyati S, et al. Community burden of  
330 undiagnosed HIV infection among adolescents in Zimbabwe following primary healthcare-based  
331 provider-initiated HIV testing and counselling: A cross-sectional survey. *PLoS Medicine*. 2017;14(7):1–  
332 15.
- 333 19. Kaufman MR, Smelyanskaya M, Van Lith LM, Mallalieu EC, Waxman A, Hatzhold K, et al. Adolescent  
334 sexual and reproductive health services and implications for the provision of voluntary medical male  
335 circumcision: Results of a systematic literature review. *PLoS ONE*. 2016;11(3):1–23.
- 336 20. Reif LK, McNairy ML, Lamb MR, Fayorsey R, Elul B. Youth-friendly services and differentiated models  
337 of care are needed to improve outcomes for young people living with HIV. *Current Opinion in HIV and*  
338 *AIDS*. 2018;13(3):249–56.
- 339 21. Nash D, Yotebieng M, Sohn AH. Treating all people living with HIV in sub-Saharan Africa : a new era  
340 calling for new approaches. *Journal of virus eradication*. 2018;4(Supplement 2):1–4.
- 341 22. Ahmed N, Pike C, Bekker LG. Scaling up pre-exposure prophylaxis in sub-Saharan Africa. *Current*  
342 *opinion in infectious diseases*. 2019;32(1):24–30.
- 343 23. Harichund C, Moshabela M. Acceptability of HIV Self-Testing in Sub-Saharan Africa: Scoping Study.  
344 *AIDS and Behavior*. 2018;22(2):560–8.
- 345 24. Armstrong A, Nagata JM, Vicari M, Irvine C, Cluver L, Sohn AH, et al. Global Research Agenda for  
346 Adolescents Living With HIV. *JAIDS*. 2018;78(16–21).
- 347 25. Wong VJ, Murray KR, Phelps BR, Vermund SH, Mccarraher DR. Adolescents, young people, and the 90  
348 – 90 – 90 goals : a call to improve HIV testing and linkage to treatment. *AIDS*. 2017;(Supplement  
349 3):191–4.
- 350 26. UNICEF. Adolescent and Youth Engagement Strategic Framework. 2017.
- 351 27. WHO. HIV AND ADOLESCENTS: GUIDANCE FOR HIV TESTING AND COUNSELLING AND CARE FOR  
352 ADOLESCENTS LIVING WITH HIV. WHO publications. 2013.
- 353 28. McKinnon B, Vander Morris A. National age-of-consent laws and adolescent HIV testing in sub-saharan  
354 Africa: A propensity-score matched study. *Bulletin of the World Health Organization*. 2019;97(1):42–  
355 50.
- 356 29. Asaolu IO, Gunn JK, Center KE, Koss MP, Iwelunmor JI, Ehiri JE. Predictors of HIV testing among youth  
357 in sub-Saharan Africa: A cross-sectional study. *PLoS ONE*. 2016;11(10):1–12.
- 358 30. Madiba S, Mokgatle M. Parents Support Implementation of HIV Testing and Counseling at School:  
359 Cross-Sectional Study with Parents of Adolescent Attending High School in Gauteng and North West  
360 Provinces, South Africa. *AIDS research and treatment*. 2016;2016:4842814.
- 361 31. Madiba S, Mokgatle M. Students want HIV testing in schools a formative evaluation of the  
362 acceptability of HIV testing and counselling at schools in Gauteng and North West provinces in South  
363 Africa. *BMC Public Health*. 2015;15(1):1–9.
- 364 32. Wilson KS, Beima-Sofie KM, Moraa H, Wagner AD, Mugo C, Mutiti PM, et al. “At our age, we would  
365 like to do things the way we want:” A qualitative study of adolescent HIV testing services in Kenya.  
366 *AIDS*. 2017;31 Suppl 3(Supplement 3):S213–20.

- 367 33. Eba PM, Lim H. Reviewing independent access to HIV testing, counselling and treatment for  
368 adolescents in HIV-specific laws in sub-Saharan Africa: implications for the HIV response. *Journal of*  
369 *the International AIDS Society* [Internet]. 2017;20(1):21456. Available from:  
370 <http://ovidsp.ovid.com/ovidweb.cgi?T=JS&PAGE=reference&D=med13&NEWS=N&AN=28799324>
- 371 34. Binagwaho A, Fuller A, Kerry V, Dougherty S, Agbonyitor M, Wagner C, et al. Adolescents and the right  
372 to health: eliminating age-related barriers to HIV/AIDS services in Rwanda. *AIDS care* [Internet].  
373 2012;24(7):936–42. Available from:  
374 <http://ovidsp.ovid.com/ovidweb.cgi?T=JS&PAGE=reference&D=med8&NEWS=N&AN=22292484>
- 375 35. Strode A, Essack Z. Facilitating access to adolescent sexual and reproductive health services through  
376 legislative reform: Lessons from the South African experience. *South African Medical Journal*  
377 [Internet]. 2017;107(9):741–4. Available from:  
378 <http://www.samj.org.za/index.php/samj/article/download/12055/8223>
- 379 36. Ministry of Health Kenya. *The Kenya HIV Testing Services Guidelines*. 2015.
- 380 37. Ministry of Health Uganda. *National HIV Testing Services Policy and Implementation Guidelines,*  
381 *Uganda*. 2016.
- 382 38. Ministry of health Rwanda. *Republic of Rwanda: National Guidelines for Prevention and Management*  
383 *of HIV and STIs*. 2016.
- 384 39. Ministry of Health Ethiopia. *National Guidelines for Comprehensive Hiv Prevention, Care and*  
385 *Treatment*. 2017.
- 386 40. Ministry of Health Malawi. *Malawi Guidelines for Clinical Management of HIV in Children and Adults*.  
387 2016.
- 388 41. Ministry of Health Zimbabwe. *Zimbabwe National Guidelines on HIV Testing and Counselling*. 2014.
- 389 42. Ministry of Health Cameroon. *NATIONAL GUIDELINE ON THE PREVENTION AND MANAGEMENT OF*  
390 *HIV IN CAMEROON*. 2015.
- 391 43. Ministry of Health Ghana. *NATIONAL HIV and AIDS, STI POLICY*. 2013.
- 392 44. Ministry of Health Swaziland. *Swaziland integrated HIV guidelines 2015*. 2015;
- 393 45. Ministry of health Lesotho. *Guidelines for the use of antiretroviral drugs for HIV prevention and*  
394 *treatment*. 2016;1–145.
- 395 46. South Africa Department of Health. *National consolidated guidelines for the prevention of mother-to-*  
396 *child transmission of HIV and the management of HIV in children, adolescents and adults*. 2015.
- 397 47. SRHR AFRICA TRUST TANZANIA. *Age of Consent: Legal Review Tanzania Country Report*. 2019.
- 398 48. UNAIDS. *UNAIDS data 2018*. 2018.
- 399 49. Nelson KM, Underhill K, Carey MP. *Consent for HIV Testing Among Adolescent Sexual Minority Males:*  
400 *Legal Status, Youth Perceptions, and Associations with Actual Testing and Sexual Risk Behavior*. *AIDS*  
401 *and Behavior*. 2019;(0123456789).
- 402 50. Radhakrishna M, Durga K, Rao RK, Mallikarjuna, Doodipala, Reddy, et al. *Factors associated with*  
403 *conversion of long-term non-progressors to progressors: A prospective study of HIV perinatally*  
404 *infected paediatric survivors*. *Indian Journal of Medical Research*. 2013;138(322–328).

- 405 51. Grabar S, Selinger-Leneman H, Abgrall S, Pialoux G, Weiss L, Costagliola D. Prevalence and  
406 comparative characteristics of long-term nonprogressors and HIV controller patients in the French  
407 Hospital Database on HIV. *Aids*. 2009;23(9):1163–9.
- 408 52. Pillay BJ, Singh JA. ‘Mental capacity’, ‘sufficient maturity’, and ‘capable of understanding’ in relation  
409 to children: how should health professionals interpret these terms? *South African Journal of*  
410 *Psychology*. 2018;48(4):538–52.
- 411 53. Michaud PA, Blum RW, Benaroyo L, Zermatten J, Baltag V. Assessing an adolescent’s capacity for  
412 autonomous decision-making in clinical care. *Journal of Adolescent Health*. 2015;57(4):361–6.
- 413 54. Griffith R. What is Gillick competence? *Human Vaccines and Immunotherapeutics*. 2016;12(1):244–7.
- 414 55. Young A. Key developments in case law: assessing competence in minors. *Practice Nursing*.  
415 2019;2019(3):140–2.
- 416 56. Denison JA, McCauley AP, Lungu N, Sweat MD. Families matter: Social relationships and adolescent  
417 HIV testing behaviors in Ndola, Zambia. *Vulnerable Children and Youth Studies*. 2014;9(2):132–8.

418

419

420

421

422

423

424

425

426

427

428

429

430

431

432

433

434

435

436

437 **Tables and figures**

438 **Table 1: Search strategy**

|               |                                                                                                                                                                                                                                                                                                                                                                                                                                                                                                                                                                                                                                                                                                                                                                                                                                                                                                                                                                                                                                                                           |
|---------------|---------------------------------------------------------------------------------------------------------------------------------------------------------------------------------------------------------------------------------------------------------------------------------------------------------------------------------------------------------------------------------------------------------------------------------------------------------------------------------------------------------------------------------------------------------------------------------------------------------------------------------------------------------------------------------------------------------------------------------------------------------------------------------------------------------------------------------------------------------------------------------------------------------------------------------------------------------------------------------------------------------------------------------------------------------------------------|
| Search term 1 | "Informed consent" <b>OR</b> consent* <b>OR</b> "legal age" <b>OR</b> law* <b>OR</b> legislature <b>OR</b><br><br>"Parental consent"                                                                                                                                                                                                                                                                                                                                                                                                                                                                                                                                                                                                                                                                                                                                                                                                                                                                                                                                      |
| <b>AND</b>    |                                                                                                                                                                                                                                                                                                                                                                                                                                                                                                                                                                                                                                                                                                                                                                                                                                                                                                                                                                                                                                                                           |
| Search term 2 | Adolescen* <b>OR</b> teen* <b>OR</b> youth* <b>OR</b> child* <b>OR</b> "young adult" <b>OR</b> "young<br>people"                                                                                                                                                                                                                                                                                                                                                                                                                                                                                                                                                                                                                                                                                                                                                                                                                                                                                                                                                          |
| <b>AND</b>    |                                                                                                                                                                                                                                                                                                                                                                                                                                                                                                                                                                                                                                                                                                                                                                                                                                                                                                                                                                                                                                                                           |
| Search term 3 | (HIV adj2 test*) <b>OR</b> (HIV adj2 diagnos *) <b>OR</b> (HIV adj2 screen*) – <i>Medline and<br/>embase proximity operator</i><br><br>(HIV w/1 test*) <b>OR</b> (HIV w/1 diagnos*) <b>OR</b> (HIV w/1 screen*) - <i>Scopus proximity<br/>operator</i><br><br>(HIV NEAR/1 test*) <b>OR</b> (HIV NEAR/1 diagnos*) <b>OR</b> (HIV NEAR/1 screen*) –<br><i>Web of science proximity operator</i>                                                                                                                                                                                                                                                                                                                                                                                                                                                                                                                                                                                                                                                                             |
| <b>AND</b>    |                                                                                                                                                                                                                                                                                                                                                                                                                                                                                                                                                                                                                                                                                                                                                                                                                                                                                                                                                                                                                                                                           |
| Search term 4 | "Africa South of the Sahara" <b>OR</b> "Sub-Saharan Africa*" <b>OR</b> "Subsaharan Africa*" <b>OR</b><br>"Central Africa*" <b>OR</b> Cameroon* <b>OR</b> "Central African Republic*" <b>OR</b> Chad* <b>OR</b><br>Congo* <b>OR</b> Gabon* <b>OR</b> "East* Africa*" <b>OR</b> Burundi* <b>OR</b> Djibouti* <b>OR</b> Eritrea* <b>OR</b><br>Ethiopia* <b>OR</b> Kenya* <b>OR</b> Rwanda* <b>OR</b> Somalia* <b>OR</b> Sudan* <b>OR</b> Tanzania* <b>OR</b><br>Uganda* <b>OR</b> "South* Africa*" <b>OR</b> Angola* <b>OR</b> Botswana* <b>OR</b> Lesotho* <b>OR</b> Malawi*<br><b>OR</b> Mozambi* <b>OR</b> Namibia* <b>OR</b> Swazi* <b>OR</b> Eswatini <b>OR</b> Zambia* <b>OR</b> Zimbabwe* <b>OR</b><br>"West* Africa*" <b>OR</b> "East* Africa*" <b>OR</b> Benin* <b>OR</b> "Burkina Faso*" <b>OR</b> "Cape<br>Verde*" <b>OR</b> "Cote d'Ivoire*" <b>OR</b> Gambia* <b>OR</b> Ghana* <b>OR</b> Guinea* <b>OR</b> Liberia* <b>OR</b><br>Madagascar* <b>OR</b> Mali* <b>OR</b> Maurit* <b>OR</b> Niger* <b>OR</b> Senegal* <b>OR</b> "Sierra Leone*" <b>OR</b><br>Togo* |

439 \* Mesh terms



440 Table 2: ***Legal age of consent for HIV testing in SSA countries***

441

| <b>Country</b>           | <b>Age of consent (years) reported in 2013<sup>(15)</sup></b> | <b>Current age of consent (years)</b> |
|--------------------------|---------------------------------------------------------------|---------------------------------------|
| Angola                   | ND                                                            | 18 (4)                                |
| Benin                    | ND                                                            | 14 (4)                                |
| Botswana                 | NA                                                            | 16 (4)                                |
| Burkina Fasso            | 18                                                            | 18 (4)                                |
| Burundi                  | ND                                                            | 16 (48)                               |
| Cameroon                 | 18                                                            | 14 (42)                               |
| Central African Republic | 18                                                            | 14 (4)                                |
| Cote d ivoire            | 18                                                            | 16 (48)                               |
| DRC                      | 18                                                            | 18 (48)                               |
| Djibouti                 | 18                                                            | 18 (48)                               |
| Eswatini/Swaziland       | 16                                                            | 12 (44)                               |
| Ethiopia                 | 15                                                            | 15 (39)                               |
| Ghana                    | 18                                                            | 18 (43)                               |
| Kenya                    | NA                                                            | 15 (36)                               |
| Lesotho                  | 12                                                            | 12 (45)                               |
| Liberia                  | 14                                                            | 14 (4)                                |
| Madagascar               | ND                                                            | 18 (4)                                |
| Malawi                   | 13                                                            | 13 (40)                               |
| Mali                     | ND                                                            | 18 (4)                                |
| Mozambique               | 16                                                            | 14 (4)                                |

|                             |    |         |
|-----------------------------|----|---------|
| Namibia                     | 16 | 14 (4)  |
| Niger                       | 18 | 16 (4)  |
| Nigeria                     | 18 | 18 (4)  |
| Rwanda                      | 15 | 12 (38) |
| Senegal                     | 16 | 14 (4)  |
| Sierra Leone                | 18 | 18 (4)  |
| South Africa                | 12 | 12 (46) |
| Sudan                       | 18 | 18 (4)  |
| Togo                        | ND | 14 (4)  |
| Uganda                      | 12 | 12 (37) |
| United republic of Tanzania | 18 | 16 (47) |
| Zambia                      | 16 | 16 (4)  |
| Zimbabwe                    | 16 | 16 (41) |

442 ***ND- Age of minority with regard to HIV testing not defined***

443 ***NA- Age is not applicable in criteria to decide adolescents who can consent for HIV testing, but***

444 ***maturity of the adolescents***

445

446

447

448

449

450

451

452

453

454

455

456 **Figure 1: Prisma diagram**

457

458

459

460

461

462

463

464

465

466

467

468

469

470

471

472

473

474

475

476

477

478

479

480

481

482

483

484

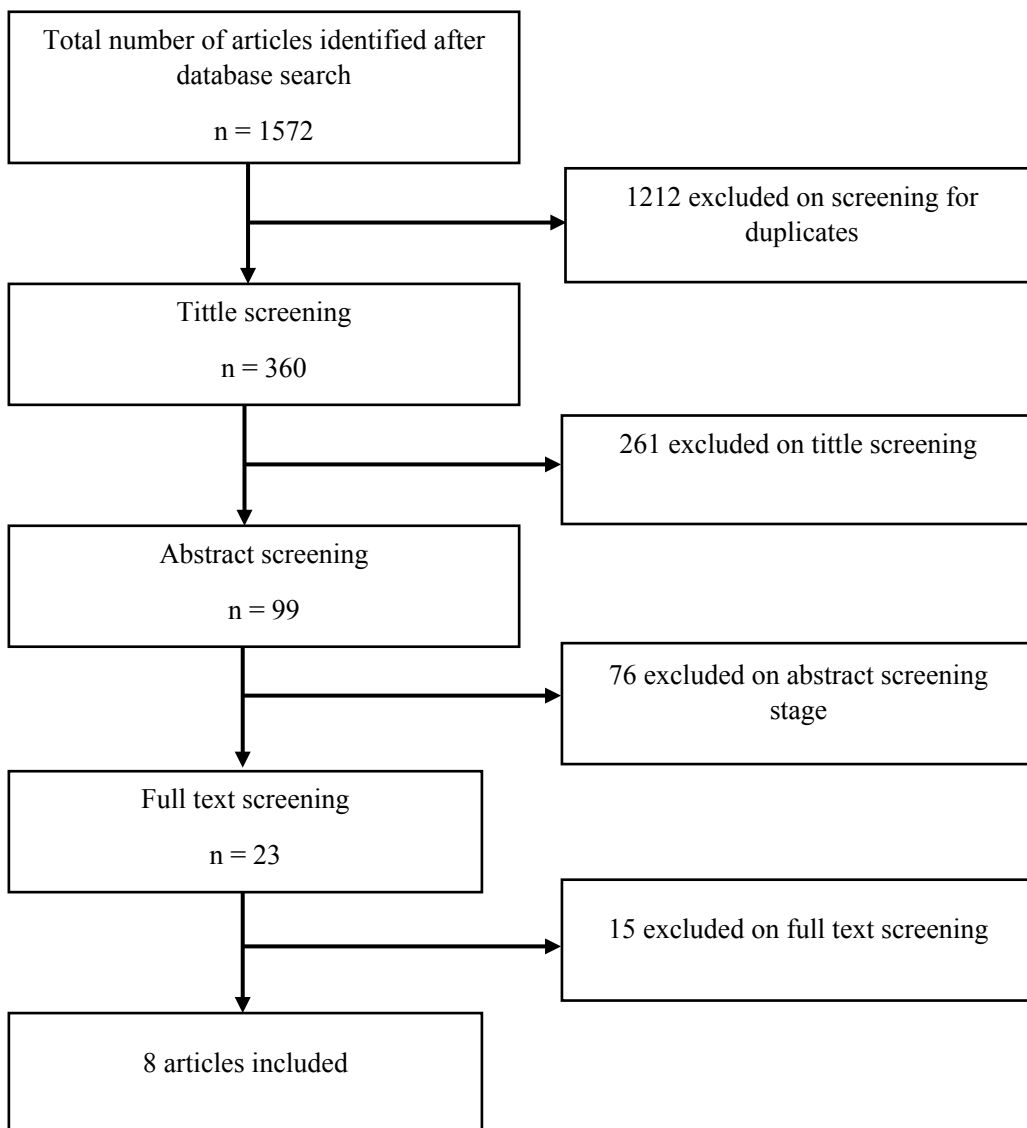

485 Figure 2: ***Age of consent in 2013 versus the age of consent in 2019***

486

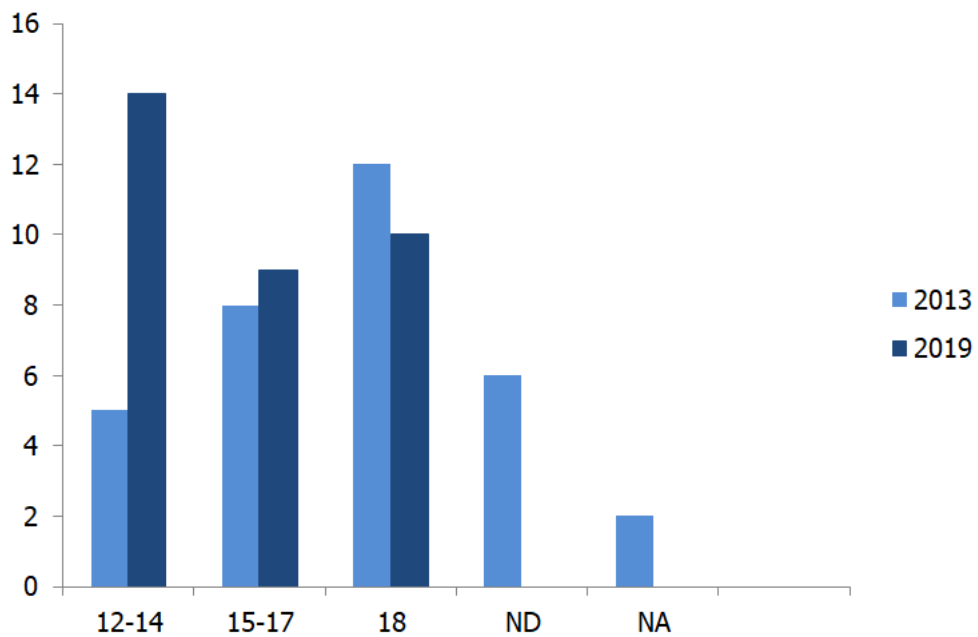

487

488 *ND- Age of consent not defined, NA- Chronological age not applicable for consent*

489

490

491

492
